# Supplementary material for: Monitoring in Real Time the Formation and Removal of Biofilms from Clinical Related Pathogens Using an Impedance-Based Technology
Source: PubMed Central journal article supplement (PMC5047529; doi:10.1371/journal.pone.0163966), 2016-10-03

# *S. aureus*

## 15981 (CV vs. CI)

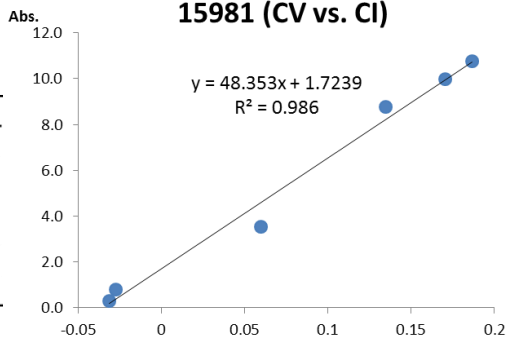

## 15981 (counts vs. CI)

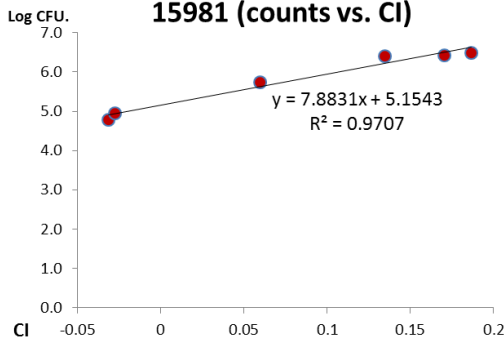

## 15981 (counts vs. CV)

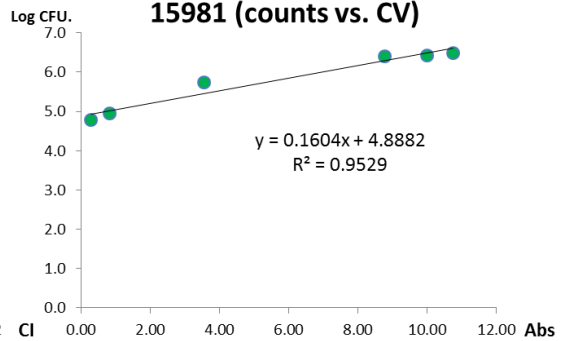

## ISP479r (CV vs. CI)

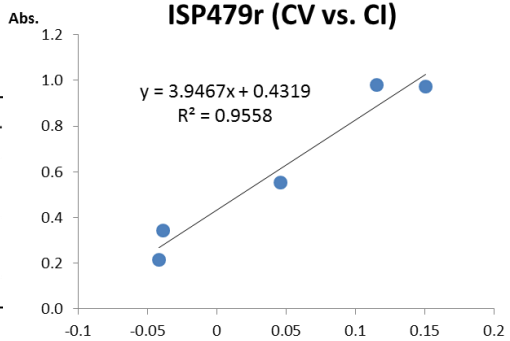

## ISP479r (counts vs. CI)

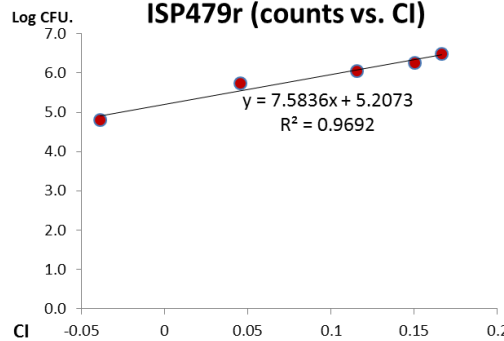

## ISP479r (counts vs. CV)

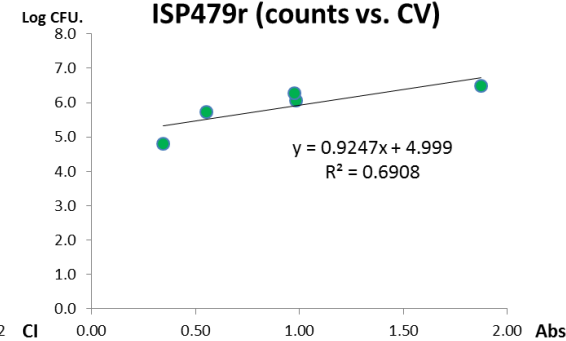

## 132 (CV vs. CI)

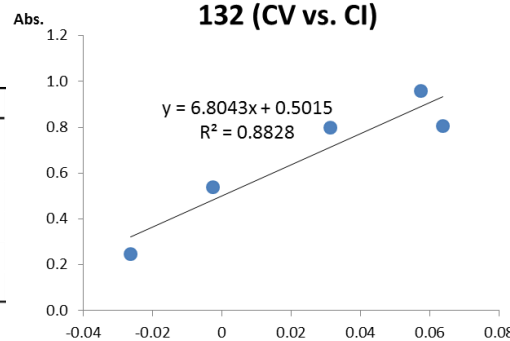

## 132 (counts vs. CI)

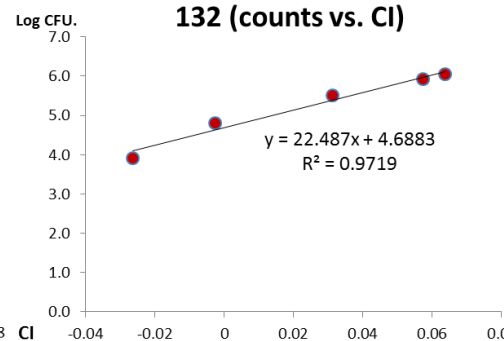

## 132 (counts vs. CV)

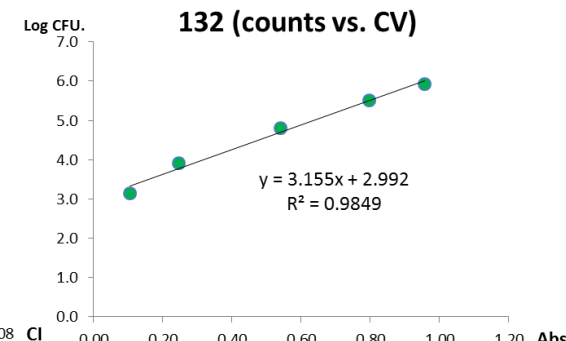

## V329 (CV vs. CI)

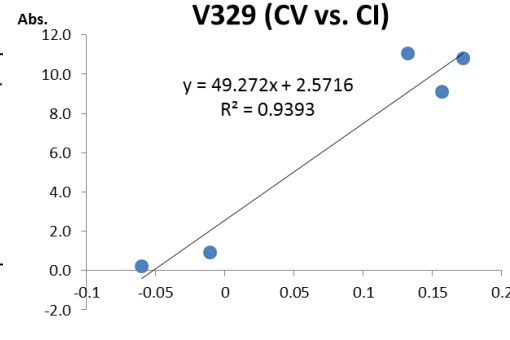

## V329 (counts vs. CI)

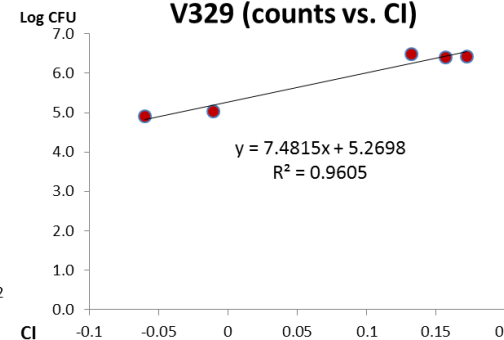

## V329 (counts vs. CV)

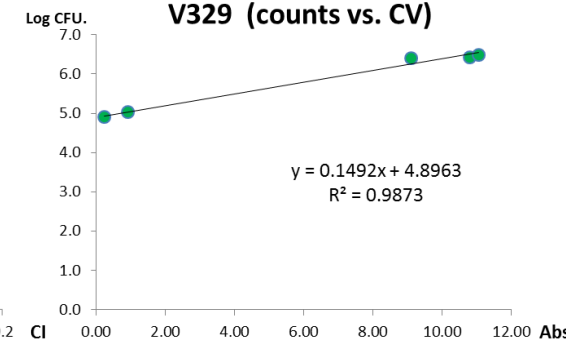

| Time (h) | CI      | Ab    | Log CFU |
|----------|---------|-------|---------|
| 1        | -0.0314 | 0.29  | 4.79    |
| 3        | -0.0274 | 0.81  | 4.94    |
| 5        | 0.0596  | 3.56  | 5.75    |
| 8        | 0.1349  | 8.78  | 6.41    |
| 16       | 0.1705  | 9.99  | 6.43    |
| 24       | 0.1865  | 10.75 | 6.49    |

| Time (h) | CI      | Ab   | Log CFU |
|----------|---------|------|---------|
| 1        | -0.0418 | 0.22 | 3.22    |
| 3        | -0.0390 | 0.35 | 4.81    |
| 5        | 0.0455  | 0.55 | 5.74    |
| 8        | 0.1154  | 0.98 | 6.06    |
| 16       | 0.1506  | 0.98 | 6.27    |
| 24       | 0.1665  | 1.87 | 6.48    |

| Time (h) | CI      | Ab   | Log CFU |
|----------|---------|------|---------|
| 1        | -0.0105 | 0.11 | 3.14    |
| 3        | -0.0263 | 0.25 | 3.92    |
| 5        | -0.0027 | 0.54 | 4.81    |
| 8        | 0.0313  | 0.80 | 5.51    |
| 16       | 0.0575  | 0.96 | 5.93    |
| 24       | 0.0637  | 0.81 | 6.05    |

| Time (h) | CI      | Ab    | Log CFU |
|----------|---------|-------|---------|
| 1        | -0.0599 | 0.24  | 4.91    |
| 3        | -0.0109 | 0.92  | 5.03    |
| 5        | 0.1251  | 2.61  | 5.75    |
| 8        | 0.1570  | 9.09  | 6.41    |
| 16       | 0.1719  | 10.79 | 6.43    |
| 24       | 0.1320  | 11.04 | 6.49    |

# *S. epidermidis*

| Time (h) | CI      | Ab   | Log CFU |
|----------|---------|------|---------|
| 1        | -0.0380 | 0.13 | 4.48    |
| 3        | -0.0318 | 0.32 | 4.69    |
| 5        | 0.0507  | 0.50 | 4.70    |
| 8        | 0.0723  | 0.79 | 6.05    |
| 16       | 0.1269  | 0.90 | 6.14    |
| 24       | 0.1423  | 0.90 | 6.34    |

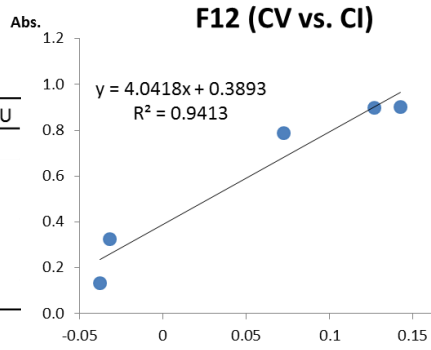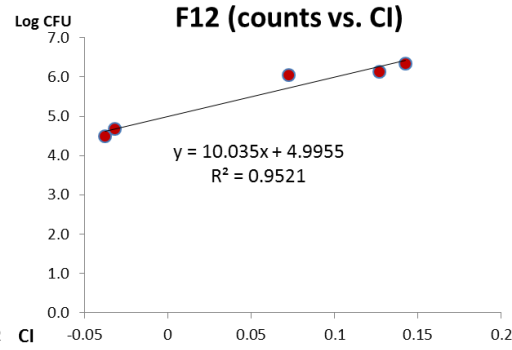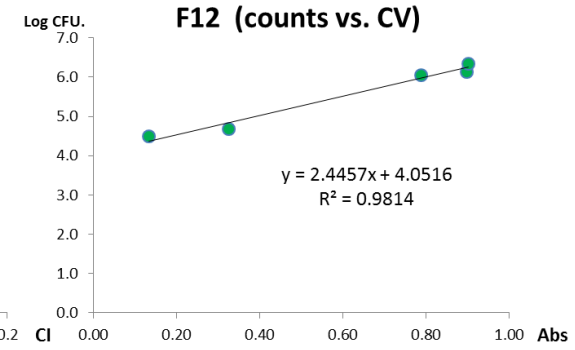

Supplement: pone.0163966.s001.pdf [file pone.0163966.s001.pdf]
