# Supplementary material for: Monitoring in Real Time the Formation and Removal of Biofilms from Clinical Related Pathogens Using an Impedance-Based Technology
Source: PubMed Central journal article supplement (PMC5047529; doi:10.1371/journal.pone.0163966), 2016-10-03

# *S. aureus*

## Strain 15981

| Time (h) | Gold   | Polyst. | S. Steel |
|----------|--------|---------|----------|
| 1        | 0.290  | 0.350   | 0.291    |
| 3        | 0.809  | 0.635   | 0.729    |
| 5        | 3.557  | 3.566   | 3.320    |
| 8        | 8.777  | 8.62    | 8.442    |
| 16       | 9.988  | 10.327  | 9.686    |
| 24       | 10.750 | 10.370  | 10.633   |

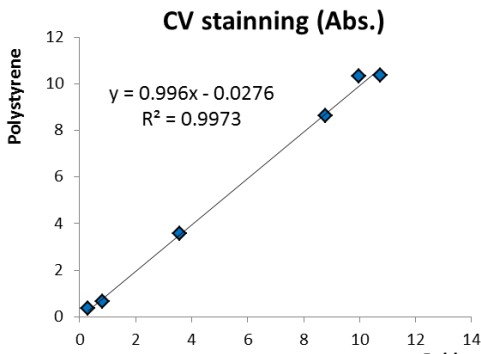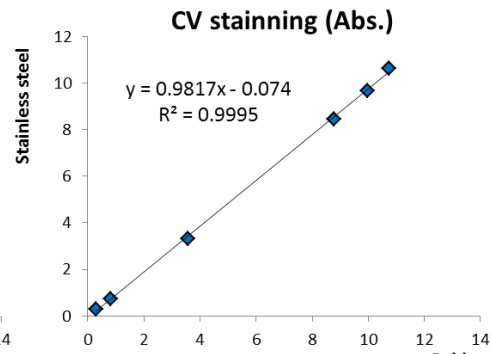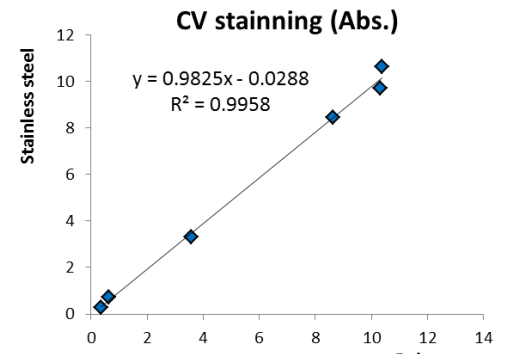

## Strain ISP479r

| Time (h) | Gold  | Polyst. | S. Steel |
|----------|-------|---------|----------|
| 1        | 0.217 | 0.138   | 0.302    |
| 3        | 0.345 | 0.382   | 0.397    |
| 5        | 0.552 | 0.557   | 0.573    |
| 8        | 0.982 | 0.927   | 0.953    |
| 16       | 0.975 | 1.078   | 1.109    |
| 24       | 1.873 | 1.823   |          |

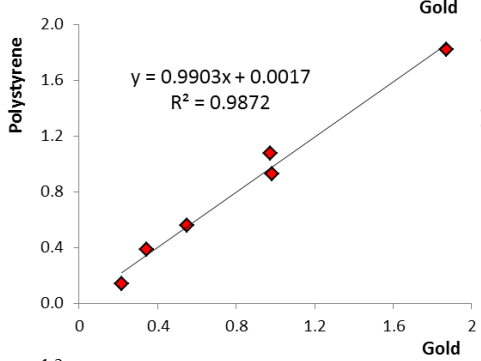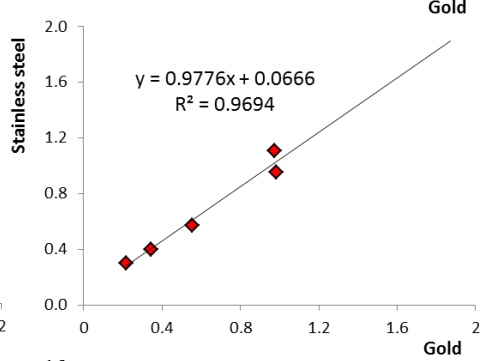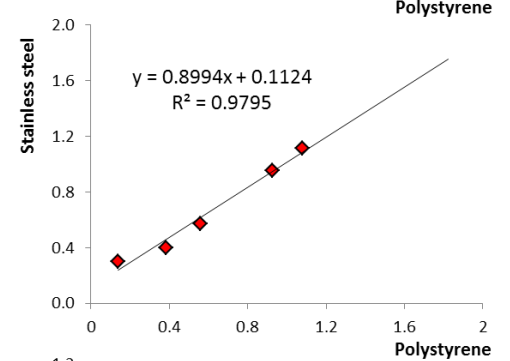

## Strain 132

| Time (h) | Gold  | Polyst. | S. Steel |
|----------|-------|---------|----------|
| 1        | 0.106 | 0.101   | 0.163    |
| 3        | 0.247 | 0.287   | 0.273    |
| 5        | 0.540 | 0.503   | 0.558    |
| 8        | 0.798 | 0.786   | 0.788    |
| 16       | 0.958 | 0.977   | 1.039    |
| 24       | 0.806 | 0.925   | 0.888    |

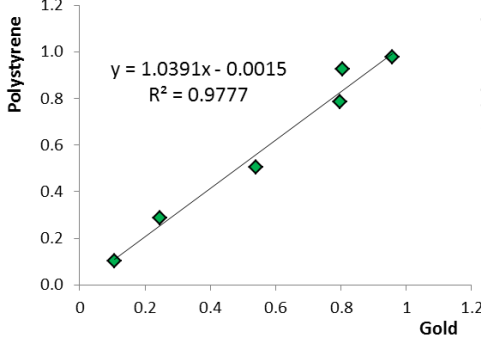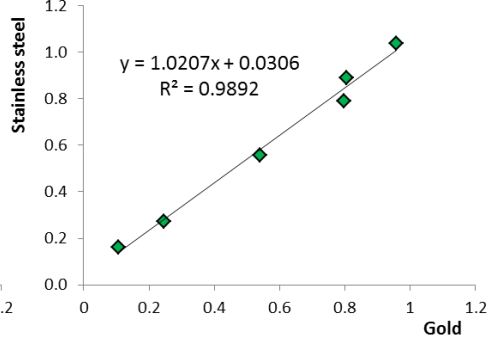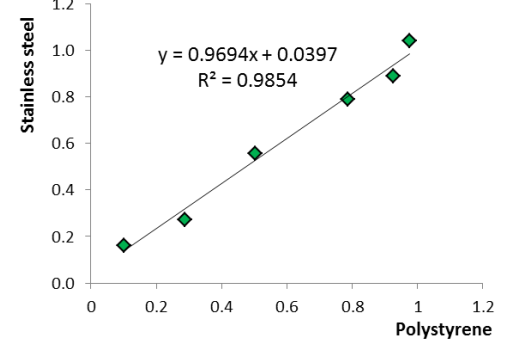

## Strain V329

| Time (h) | Gold   | Polyst. | S. Steel |
|----------|--------|---------|----------|
| 1        | 0.240  | 0.227   | 0.274    |
| 3        | 0.920  | 0.885   | 0.918    |
| 5        | 2.610  | 2.300   | 2.486    |
| 8        | 9.090  | 9.257   | 9.720    |
| 16       | 10.790 | 10.290  | 10.367   |
| 24       | 11.040 | 10.950  | 10.820   |

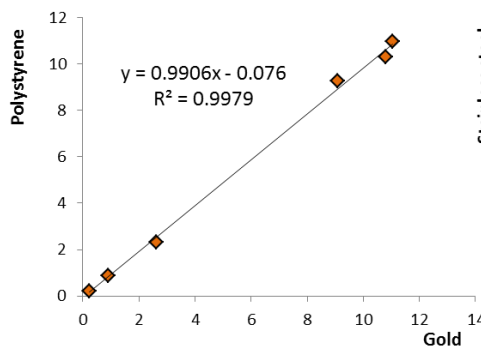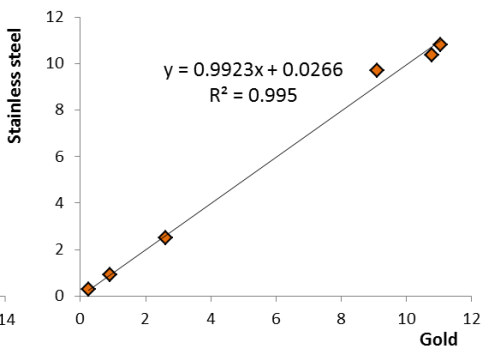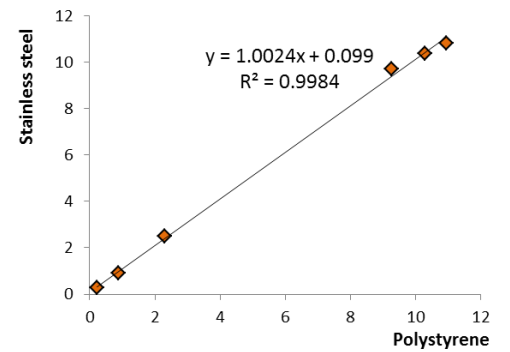

# *S. epidermidis*

## Strain F12

| Time (h) | Gold  | Polyst. | S. Steel |
|----------|-------|---------|----------|
| 1        | 0.134 | 0.207   | 0.230    |
| 3        | 0.325 | 0.339   | 0.349    |
| 5        | 0.500 | 0.527   | 0.490    |
| 8        | 0.788 | 0.795   | 0.726    |
| 16       | 0.898 | 0.881   | 0.835    |
| 24       | 0.901 | 0.914   | 0.856    |

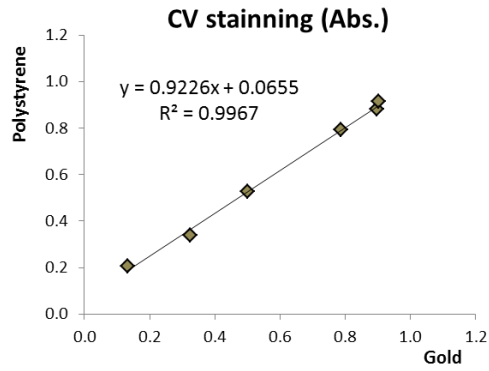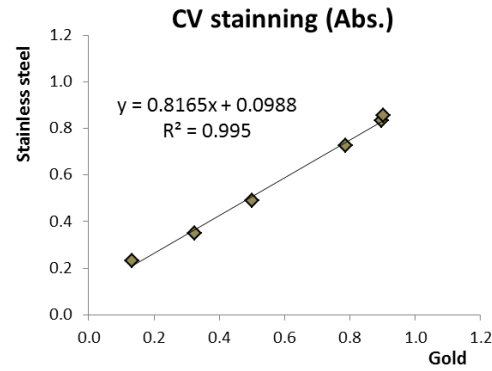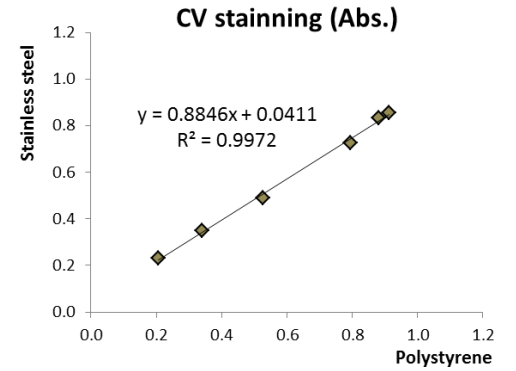

Supplement: pone.0163966.s002.pdf [file pone.0163966.s002.pdf]
