# Supplementary material for: Monitoring in Real Time the Formation and Removal of Biofilms from Clinical Related Pathogens Using an Impedance-Based Technology
Source: PubMed Central journal article supplement (PMC5047529; doi:10.1371/journal.pone.0163966), 2016-10-03
Supplement: pone.0163966.s003.pdf [file pone.0163966.s003.pdf]

| Time                  | Species               | Strain           | Mean $\pm$ SD                   |                                 |                                |
|-----------------------|-----------------------|------------------|---------------------------------|---------------------------------|--------------------------------|
|                       |                       |                  | CI                              | Absorbance                      | Log CFU/ml                     |
| 8 h                   | <i>S. aureus</i>      | ISP479r          | 0.115 $\pm$ 0.006 <sup>c</sup>  | 0.982 $\pm$ 0.004 <sup>b</sup>  | 6.05 $\pm$ 0.06 <sup>c</sup>   |
|                       |                       | 15981            | 0.135 $\pm$ 0.013 <sup>d</sup>  | 8.777 $\pm$ 0.181 <sup>c</sup>  | 6.40 $\pm$ 0.09 <sup>d</sup>   |
|                       |                       | 132              | 0.031 $\pm$ 0.003 <sup>b</sup>  | 0.798 $\pm$ 0.012 <sup>b</sup>  | 5.51 $\pm$ 0.01 <sup>b</sup>   |
|                       |                       | V329             | 0.157 $\pm$ 0.003 <sup>e</sup>  | 9.091 $\pm$ 0.493 <sup>c</sup>  | 6.41 $\pm$ 0.11 <sup>d</sup>   |
|                       |                       | CH1368           | 0.012 $\pm$ 0.000 <sup>a</sup>  | 0.044 $\pm$ 0.019 <sup>a</sup>  | 2.51 $\pm$ 0.01 <sup>a</sup>   |
|                       |                       |                  | ***                             | ***                             | ***                            |
|                       | <i>S. epidermidis</i> | F12              | 0.072 $\pm$ 0.003               | 0.788 $\pm$ 0.002               | 6.05 $\pm$ 0.04                |
|                       |                       | CH48             | -0.066 $\pm$ 0.001              | 0.051 $\pm$ 0.015               | 2.30 $\pm$ 0.02                |
|                       |                       |                  | ***                             | ***                             | ***                            |
|                       | 16 h                  | <i>S. aureus</i> | ISP479r                         | 0.151 $\pm$ 0.011 <sup>c</sup>  | 0.975 $\pm$ 0.050 <sup>b</sup> |
| 15981                 |                       |                  | 0.171 $\pm$ 0.009 <sup>d</sup>  | 9.986 $\pm$ 0.138 <sup>c</sup>  | 6.43 $\pm$ 0.07 <sup>d</sup>   |
| 132                   |                       |                  | 0.057 $\pm$ 0.003 <sup>b</sup>  | 0.958 $\pm$ 0.037 <sup>b</sup>  | 5.93 $\pm$ 0.02 <sup>b</sup>   |
| V329                  |                       |                  | 0.172 $\pm$ 0.000 <sup>d</sup>  | 10.788 $\pm$ 0.199 <sup>d</sup> | 6.50 $\pm$ 0.03 <sup>e</sup>   |
| CH1368                |                       |                  | 0.014 $\pm$ 0.001 <sup>a</sup>  | 0.027 $\pm$ 0.002 <sup>a</sup>  | 2.33 $\pm$ 0.01 <sup>a</sup>   |
|                       |                       |                  | ***                             | ***                             | ***                            |
| <i>S. epidermidis</i> |                       | F12              | 0.127 $\pm$ 0.006               | 0.898 $\pm$ 0.003               | 6.14 $\pm$ 0.02                |
|                       |                       | CH48             | 0.080 $\pm$ 0.006               | 0.034 $\pm$ 0.002               | 2.02 $\pm$ 0.06                |
|                       |                       |                  | ***                             | ***                             | ***                            |
| 24 h                  |                       | <i>S. aureus</i> | ISP479r                         | 0.167 $\pm$ 0.008 <sup>d</sup>  | 1.873 $\pm$ 0.017 <sup>c</sup> |
|                       | 15981                 |                  | 0.187 $\pm$ 0.012 <sup>e</sup>  | 10.750 $\pm$ 0.550 <sup>d</sup> | 6.49 $\pm$ 0.03 <sup>c</sup>   |
|                       | 132                   |                  | 0.064 $\pm$ 0.003 <sup>b</sup>  | 0.806 $\pm$ 0.001 <sup>b</sup>  | 6.04 $\pm$ 0.05 <sup>b</sup>   |
|                       | V329                  |                  | 0.132 $\pm$ 0.000 <sup>c</sup>  | 11.042 $\pm$ 0.361 <sup>d</sup> | 6.48 $\pm$ 0.04 <sup>c</sup>   |
|                       | CH1368                |                  | -0.030 $\pm$ 0.002 <sup>a</sup> | 0.033 $\pm$ 0.001 <sup>a</sup>  | 2.02 $\pm$ 0.02 <sup>a</sup>   |
|                       |                       |                  | ***                             | ***                             | ***                            |
|                       | <i>S. epidermidis</i> | F12              | 0.142 $\pm$ 0.011               | 0.901 $\pm$ 0.056               | 6.34 $\pm$ 0.01                |
|                       |                       | CH48             | 0.096 $\pm$ 0.004               | 0.017 $\pm$ 0.005               | 1.26 $\pm$ 0.24                |
|                       |                       |                  | ***                             | ***                             | ***                            |
