# Supplementary material for: Monitoring in Real Time the Formation and Removal of Biofilms from Clinical Related Pathogens Using an Impedance-Based Technology
Source: PubMed Central journal article supplement (PMC5047529; doi:10.1371/journal.pone.0163966), 2016-10-03
Supplement: pone.0163966.s004.pdf [file pone.0163966.s004.pdf]

| <b>Strain</b>             | <b>Time (h)</b>    | <b>Treatment</b> | <b>CI(Mean ± SD)</b> | <b>p-value</b> |
|---------------------------|--------------------|------------------|----------------------|----------------|
| <i>S. aureus</i> 15981    | 1                  | Control          | -0.055±0.0111        | 0.504          |
|                           |                    | LysH5            | -0.050±0.0050        |                |
|                           | 2                  | Control          | -0.053±0.0092        | 0.540          |
|                           |                    | LysH5            | -0.049±0.0040        |                |
|                           | 3                  | Control          | -0.044±0.0234        | 0.447          |
|                           |                    | LysH5            | -0.031±0.0111        |                |
|                           | 4                  | Control          | -0.018±0.0017        | <b>0.038</b>   |
|                           |                    | LysH5            | -0.012±0.0027        |                |
|                           | 5                  | Control          | 0.050±0.0165         | 0.413          |
|                           |                    | LysH5            | 0.038±0.0165         |                |
| 6                         | Control            | 0.085±0.0090     | <b>0.001</b>         |                |
|                           | LysH5              | 0.042±0.0010     |                      |                |
| 7                         | Control            | 0.097±0.0003     | <b>0.000</b>         |                |
|                           | LysH5              | 0.045±0.0003     |                      |                |
| 8                         | Control            | 0.110±0.0142     | <b>0.002</b>         |                |
|                           | LysH5              | 0.048±0.0005     |                      |                |
| 9                         | Control            | 0.127±0.0094     | <b>0.000</b>         |                |
|                           | LysH5              | 0.049±0.0006     |                      |                |
| 10                        | Control            | 0.129±0.0134     | <b>0.000</b>         |                |
|                           | LysH5              | 0.047±0.0016     |                      |                |
| <i>S. epidermidis</i> F12 | 1                  | Control          | -0.054±0.0151        | 0.893          |
|                           |                    | phi-IPLA7        | -0.052±0.0067        |                |
|                           | 2                  | Control          | -0.053±0.0087        | 0.991          |
|                           |                    | phi-IPLA7        | -0.053±0.0078        |                |
|                           | 3                  | Control          | -0.027±0.0066        | 0.819          |
|                           |                    | phi-IPLA7        | -0.027±0.0065        |                |
|                           | 4                  | Control          | 0.019±0.0049         | <b>0.012</b>   |
|                           |                    | phi-IPLA7        | 0.006±0.0027         |                |
|                           | 5                  | Control          | 0.025±0.0037         | <b>0.003</b>   |
|                           |                    | phi-IPLA7        | 0.011±0.0015         |                |
| 6                         | Control            | 0.058±0.0027     | <b>0.001</b>         |                |
|                           | phi-IPLA7          | 0.043±0.0005     |                      |                |
| 7                         | Control            | 0.064±0.0062     | 0.219                |                |
|                           | phi-IPLA7          | 0.058±0.0006     |                      |                |
| 8                         | Control            | 0.069±0.0022     | <b>0.000</b>         |                |
|                           | phi-IPLA7          | 0.048±0.0017     |                      |                |
| 9                         | Control            | 0.076±0.0032     | <b>0.002</b>         |                |
|                           | phi-IPLA7          | 0.057±0.0029     |                      |                |
| 10                        | Control            | 0.081±0.0051     | <b>0.002</b>         |                |
|                           | phi-IPLA7 (MOI100) | 0.056±0.0026     |                      |                |
